1 **Portable and label-free quantitative Loop-mediated Isothermal**  
2 **Amplification (qLAMP) for reliable COVID-19 diagnostics in 3 minutes:**  
3 **An Arduino-based detection system assisted by a pH microelectrode**

4

5 Mario Moisés Alvarez<sup>1,2,\*</sup>, Sergio Bravo-González<sup>1,2</sup>, Everardo González-González<sup>1,2</sup>,

6 Grissel Trujillo-de Santiago<sup>1,3,\*</sup>,

7

8 1) *Centro de Biotecnología-FEMSA, Tecnológico de Monterrey, Monterrey 64849,*

9 *NL, México*

10 2) *Departamento de Bioingeniería, Escuela de Ingeniería y Ciencias, Tecnológico de*

11 *Monterrey, Monterrey 64849, NL, México*

12 3) *Departamento de Ingeniería Mecatrónica y Eléctrica, Escuela de Ingeniería y*

13 *Ciencias, Tecnológico de Monterrey, Monterrey 64849, NL, México*

14

15 (\*) corresponding authors: [grissel@tec.mx](mailto:grissel@tec.mx); [mario.alvarez@tec.mx](mailto:mario.alvarez@tec.mx)

16

17 **Abstract**

18 Loop-mediated isothermal amplification (LAMP) has been recently studied as an  
19 alternative method for cost-effective diagnostics in the context of the current COVID-19  
20 pandemic. Recent reports document that LAMP-based diagnostic methods have a  
21 comparable sensitivity and specificity to that of RT-qPCR. We report the use of a portable  
22 Arduino-based LAMP-based amplification system assisted by pH microelectrodes for the

23 accurate and reliable diagnosis of SARS-CoV-2 during the first 3 minutes of the  
24 amplification reaction. We show that this simple system enables a straightforward  
25 discrimination between samples containing or not containing artificial SARS-CoV-2  
26 genetic material in the range of 10 to 10,000 copies per 50  $\mu$ L of reaction mix. We also  
27 spiked saliva samples with SARS-CoV-2 synthetic material and corroborated that the  
28 LAMP reaction can be successfully monitored in real time using microelectrodes in saliva  
29 samples as well. These results may have profound implications for the design of real-time  
30 and portable quantitative systems for the reliable detection of viral pathogens including  
31 SARS-CoV-2.

32

33 Keywords: SARS-CoV-2, COVID-19, qLAMP, amplification, diagnostics, electrodes.

34

To be submitted to

35

*Biosensors and Bioelectronics*

36

## 37 **Introduction**

38 At present, nearly 150 million people have been diagnosed with COVID-19 (+) worldwide,  
39 and the disease has killed more than 3 million people [1], making it the most lethal  
40 infectious disease in a century. COVID-19 has laid bare the severe limitations in our  
41 capacities to respond to epidemic emergencies and has made clear that we must expand and  
42 strengthen the portfolio of available tools for effective diagnostics of infectious diseases [2]  
43 both now and in the future.

44 The retro-transcriptase quantitative polymerase chain reaction (RT-qPCR) is currently the  
45 gold standard methodology for COVID-19 detection [2–5]. Despite its unquestionable  
46 accuracy and robustness, qPCR-based methods have some serious limitations (e.g., lack of

47 portability, dependence on centralized facilities, need for technical expertise to conduct RT-  
48 qPCR testing, and high infrastructural and operative costs) that prevent the provision of  
49 cost-effective and massive diagnostics during this time of COVID-19 [2,6,7].

50 One potential alternative to RT-qPCR could be Loop-mediated Isothermal Amplification  
51 (LAMP), which has been extensively studied in recent reports as a cost-effective diagnostic  
52 system in the context of the current COVID-19 pandemic [8–16]. Overall, these reports  
53 have documented that LAMP-based methods have comparable sensitivity and specificity to  
54 that of RT-qPCR. More importantly, LAMP methods provide attractive advantages over  
55 RT-qPCR methods in terms of lower capital and operating costs. LAMP is an isothermal  
56 method, so it frees the user from the need for a costly thermal cycler. In addition, LAMP  
57 methods that exhibit excellent sensibility and acceptable specificity have been described for  
58 the extraction-free analysis of nasopharyngeal and even saliva samples [15,17,18]. The  
59 release from the need for an extraction stage further reduces the cost of LAMP  
60 methodology.

61 Most LAMP-based methods rely on a discrimination between positive and negative  
62 samples due to a change in the pH associated with an acidification of the reaction mix due  
63 to the liberation of hydrogen ions ( $H_3O^+$ ) inherent in the amplification [15,17,19]. In a  
64 weakly buffered reaction medium, the change in pH may translate into a change in color if  
65 a pH indicator is added to the reaction mix. A frequent embodiment of colorimetric LAMP  
66 uses phenol red as the pH indicator [17,19–21] and a weak buffer that contains mainly Tris-  
67 HCl,  $(NH_4)_2SO_4$  (ammonium sulfate), and KCl (potassium chloride).

68 However, colorimetric LAMP methods also have some limitations. One is that the adequate  
69 performance of colorimetric LAMP mediated by phenol red depends on the initial pH of the

70 sample. This is particularly relevant in extraction-free applications, since acidic samples  
71 may prematurely shift the color of the reaction mix, even in non-infected saliva samples,  
72 thereby possibly rendering false positives. LAMP-based methods also use from four to six  
73 primer sets, and the design of LAMP primer sets is nontrivial as the primers may interact  
74 among themselves during amplification. This can promote non-specific amplifications that  
75 may also result in false positives[22,23].

76 In the present study, we demonstrate the straightforward use of microelectrodes to monitor,  
77 in real time, the evolution of the amplification of SARS-CoV-2 genetic material. This  
78 simple implementation renders a quantitative and label-free embodiment of the LAMP  
79 reaction (LF-LAMP) for amplification of any genetic sequence. Label free quantitative  
80 LAMP (LF-qLAMP) allows the continuous and online monitoring of the change in the  
81 electric potential of the reaction mix due to the release of hydrogen ions during  
82 amplification. We show that the progressions of the signal from truly positive samples  
83 (samples containing genetic material from SARS-CoV-2) and negative samples clearly  
84 differ in LF-qLAMP. Therefore, this method provides a straightforward way to distinguish  
85 pH shifts that are truly due to specific amplifications and are not false positives.

86 In this time of COVID-19, we also illustrate LF-qLAMP for the diagnostics of COVID-19  
87 from saliva samples spiked with SARS-CoV-2 nucleic acids. Overall, we demonstrate the  
88 utility of extraction-free LF-LAMP for COVID-19 from samples containing artificial  
89 SARS-CoV-2 genetic material and from saliva samples containing artificial SARS-CoV-2  
90 genetic material.

91

92

## 93 **Materials and methods**

### 94 *Equipment specifications:*

95 We fabricated a simple and portable prototype for the isothermal incubation of samples and  
96 online monitoring of the LAMP amplification process using a commercial and low-cost pH  
97 sensor (Gaohau pH 0–14; available at Amazon.com; USA), a commercial pH electrode  
98 (inLab nano; Mettler Toledo, Switzerland), and an Arduino UNO® microprocessor  
99 (Arduino, Italy).

100 This *ad hoc* heating system was assembled with components acquired over the internet  
101 (amazon.com) and consisted of a 12V eliminator, a 10 mL vessel with a silicon lead, a  
102 heating mat (electric resistance), and an Arduino UNO–based proportional integral  
103 derivative (PID) temperature controller (fully described in the supplementary material). The  
104 Arduino-based PID controller is depicted in Figure 2A and Figure S1. The code used in our  
105 heating/amplification experiments has been made available as supplementary material  
106 (Supplementary file 1).

107 The evolution of the amplification process was followed using commercially available pH  
108 electrodes (inLab nano, from Mettler Toledo, Switzerland; and Lab Sen 241-3, from Apera  
109 Instruments, available at Amazon.com). These electrodes were interfaced through an  
110 Arduino UNO microprocessor using a pH sensor module (Gaohou pH 0-14 detect sensor  
111 module, available at Amazon.com). The InLab microelectrode, with a tip diameter of 1.3  
112 mm, can be easily placed inside a conventional 200  $\mu$ L Eppendorf tube and enables the use  
113 of small reaction volumes (25–50  $\mu$ L of reaction mix and sample). Alternatively, we have  
114 run online experiments using a lower cost electrode from Apera Instruments (~150 USD)

115 with a tip diameter of 3 mm, which can also be used with similar measuring performance  
116 (supplementary material; Figure S1) if a larger reaction volume is used (~50  $\mu$ L).

117 In our experiments, the insertion of the electrode within the reaction mix impedes closure  
118 of the Eppendorf tube during incubation. To avoid evaporation during heating, two drops of  
119 mineral oil were dispensed into each Eppendorf tube before electrode placement to allow  
120 the development of a thin lid layer of mineral oil at the liquid surface of the reaction mix.  
121 The Arduino code used in the experiments reported here are available as supplemental  
122 material (Supplemental file 1).

123 *Experiments with synthetic genetic material:* We ran several series of experiments where  
124 samples containing different quantities of SARS-CoV-2 synthetic genetic material were  
125 analyzed using LF-qLAMP. These amplification experiments were conducted using the  
126 homemade system previously described for isothermal heating of the samples at 62.5 +/-  
127 1.5  $^{\circ}$ C and for online monitoring of the progression of the electric potential in the reaction  
128 mix during amplification.

129 Samples were prepared by adding 4  $\mu$ L of a solution containing the DNA template to 250  
130  $\mu$ L Eppendorf tubes containing 25  $\mu$ L WarmStart<sup>®</sup> Colorimetric LAMP 2 $\times$  Master Mix  
131 (DNA & RNA) from New England Biolabs (MA, USA), 18  $\mu$ L nuclease-free water  
132 from New England Biolabs (MA, USA), and 2  $\mu$ L primer solution. Samples were prepared  
133 by adding different quantities of positive DNA templates (i.e., 0, 10, 100, 1,000, and 10,000  
134 copies of the gene N from SARS-CoV-2; Integrated DNA Technologies, IA, USA).  
135 Negative amplification controls were prepared using the reaction mix, as previously  
136 described, but without primer addition.

137 *Preparation of saliva samples spiked with RNA extracts:* A set of 5 saliva samples obtained  
138 from healthy volunteers was spiked with different quantities of SARS-CoV-2 synthetic  
139 genetic material. Saliva samples were also collected from a COVID-19(+) patient  
140 after obtaining written consent and in full compliance with the principles stated in  
141 the Helsinki Declaration. Every precaution has been taken to protect the privacy of  
142 sample donors and the confidentiality of their personal information. Our  
143 experimental protocols for saliva collection and saliva use in amplification was  
144 approved, as part of a wider study to collect and test saliva samples from human  
145 volunteers, by the Alfa Medical Research Committee in the resolution AMCCI-  
146 TECCOVID-001 on May 20th, 2020 (Alfa Medical Center, Research Committee;  
147 Monterrey, NL, México). Saliva samples were inactivated by heat treatment at 62.5 °C  
148 for 35 minutes prior to amplification.

149 *Amplification mix:* We used WarmStart<sup>®</sup> Colorimetric LAMP 2× Master Mix (DNA &  
150 RNA) from New England Biolabs (MA, USA), and followed the recommended protocol:  
151 25 µL Readymix, 1.6 µM FIP primer, 1.6 µM BIP primer, 0.2 µM F3 primer, 0.2 µM B3  
152 primer, 0.4 µM LF primer, 0.4 µM LB primer, 2 µL DNA template (~ 625 to  $2 \times 10^5$  DNA  
153 copies), and nuclease-free water in a final reaction volume of 50 µL. This commercial mix  
154 contains phenol red as a pH indicator to reveal the pH shift occurring during LAMP  
155 amplification across the threshold of pH=6.8.

156 *Primers used:* A sets of six LAMP primers, referred to here as the  $\alpha$ -set, was designed in  
157 house using the LAMP primer design software Primer Explorer V5  
158 (<http://primerexplorer.jp/lampv5e/index.html>). These LAMP primers were designed to  
159 target a region of the sequence of the SARS-CoV-2 N gene; specifically, they were based

160 on the analysis of alignments of the SARS-CoV-2 N gene sequences using the Geneious  
161 software (Auckland, New Zealand).

162 RT-qPCR amplification experiments were conducted using one the primer sets  
163 recommended by the Centers for Disease Control (CDC) for the standard diagnostics of  
164 COVID-19 (i.e., the N1 assay). The sequences of our LAMP primers are presented in Table  
165 1. The sequences of the PCR primers (N1) have been reported elsewhere [24,25].

166 *Amplification protocols:* For all LAMP experiments, we performed isothermal heating at  
167 62.5 +/- 1.2 °C for 30 to 60 min.

168

## 169 **Results and discussion**

### 170 **Rationale of the design and operation**

171 Here, we have demonstrated the use a portable Arduino-based LAMP system as a label-free  
172 quantitative method (LF-qLAMP) for the reliable and fast identification of samples  
173 containing SARS-CoV-2 genetic material. We have introduced a simple and fully portable  
174 setup for the detection of viral genetic material using commercially available pH  
175 microelectrodes for real-time monitoring of the progression of LAMP reactions.  
176 Remarkably, this LAMP-based method is capable of discerning between positive and  
177 negative samples during the first three minutes of amplification.

178 The rationale behind the operation of this strategy is straightforward. In the weakly  
179 buffered reaction mix used for LAMP, the release of  $H_3O^+$  ions inherent in the  
180 amplification process [26] can be measured in real time as a difference in the electric  
181 potential[27,28] or a pH change [29,30]. We fabricated a simple and portable prototype to



182 accomplish two purposes: the isothermal incubation of samples and the online monitoring  
183 of the amplification process. To this aim, we used a commercial and low-cost pH sensor, a  
184 commercial pH electrode, and an Arduino UNO® microprocessor.

185 Figure 1 shows the different aspects of this prototype. The isothermal amplification  
186 reactions were conducted at  $62.5\text{ }^{\circ}\text{C} \pm 1.5\text{ }^{\circ}\text{C}$  in 200  $\mu\text{L}$  Eppendorf tubes immersed in a  
187 mineral oil bath (Figure 1A) and containing a total reaction mix volume of 50  $\mu\text{L}$ . The tip  
188 of a commercial pH microelectrode was immersed into the reaction mix for online  
189 monitoring of the progression of the electric potential (in mV) using an Arduino-based  
190 system. A simple Arduino code was used to enable the collection and transmission of data  
191 to the computer (Supplementary File S1); the difference in the electric potential ( $\Delta P$ ), as  
192 evaluated in the reaction solution, was continuously transmitted and recorded at a sampling  
193 rate of 1 Hz (i.e., 1 sampling point per second).

194 The stability of the electric potential readings is affected by temperature fluctuations around  
195 the set point. Therefore, adequate temperature control ( $62.5\text{ }^{\circ}\text{C} \pm 1.5\text{ }^{\circ}\text{C}$ ) is highly  
196 recommended for conclusive results. In our experiments, executed at home, the temperature  
197 within the water bath was controlled at  $62.5\text{ }^{\circ}\text{C}$  using the Arduino-based PID controller.  
198 For convenience, we have included all the information needed to build this portable and  
199 low-cost isothermal PID-incubator for Eppendorf tubes that enables full portability (Figure  
200 1; Figure 2) of the system. Alternatively, the LAMP reaction can be incubated in any  
201 commercial thermo block or in a miniPCR® apparatus [31].

202 **Figure 1**

203 Figure 2 schematically shows the connections that should be made between the Arduino  
204 microcontroller, the low-cost pH sensor, and the rest of the components of the circuit that

205 constitute the PID control system and the online electric potential monitor. Figure S1 (in  
206 supplementary material) shows an image of the actual experimental Arduino-based PID  
207 controller system.

208 **Figure 2**

209 **Characterization of the performance of the monitoring system**

210 We evaluated the stability of the potential signal at the temperature set point and during  
211 temperature ramps. The electric potential is a strong function of the temperature (Figure  
212 3A). For instance, the electric potential increased ~90 mV per 10°C in our experiments in  
213 the range of 45 to 55 °C. By contrast, at isothermal conditions, the intrinsic variation of the  
214 electric potential was very stable; the variations were lower than 0.3% for the range of pH  
215 buffers that we assayed.

216 We also analyzed the ability of this simple PID controller to function for extended  
217 incubation periods (i.e., 60 minutes) and under different room temperatures (Figure 3B).  
218 Overall, we found that this simple incubator system is sufficiently robust to maintain the  
219 temperature at the set point (average temperature of 62.5 °C; average standard deviation of  
220 0.5 °C) regardless of the room temperature (i.e., in a range between 15 and 25 °C). As we  
221 will show, this level of control is sufficient to obtain reliable and reproducible results of  
222 determination of the electric potential in solutions with different pH values and during  
223 LAMP reactions.

224 In a first set of experiments, we evaluated the robustness and consistency of the  
225 characteristics of the electrode readings at different pH values. Figure 3A shows

226 representative readings associated with the immersion of the microelectrode in buffer  
227 solution of different pH values (i.e., pH 6.0, 6.4, 6.8, 7.2, 7.6, and 8.0).

### 228 **Figure 3**

229 The standard deviation associated with the readings within this window of pH values  
230 ranges from 1.38 and 6.91 mV (Table S1). For example, the average electric potential  
231 measured for a buffer solution at pH 6.8 (which is approximately the threshold value of  
232 phenol red) was 2777 mV and exhibited a standard deviation of +/- 1.38 mV.

233 A buffer solution at pH 8.0 (which is similar to the pH value of the LAMP buffer used) had  
234 an electric potential of 2587.58 mV with a standard deviation of +/-6.21 mV. Overall, we  
235 observed coefficients of variance lower than 0.3% for all the experiments conducted in the  
236 absence of amplification reactions. In all these cases, the electric potential remains  
237 essentially stable during incubation periods of 60 minutes. This indicates that the inherent  
238 error (i.e., the intrinsic fluctuation associated with the potential signal at the experimental  
239 conditions) is in the range of +/- 12.3 mV (i.e., the maximum standard deviations are lower  
240 than 7 mV). We also evaluated the stability of the signal reported by the microelectrode  
241 when immersed in the buffer of the reaction mix. Our results also suggest that the potential  
242 readings obtained using this simple sensing system are robust and steady, with intrinsic  
243 coefficients of variance lower than 1%.

### 244 **Discrimination between positive and negative samples**

245 Using the simple Arduino-based system that we have described, we incubated a series of  
246 LAMP reactions and monitored the progress of the amplification reaction by measuring the  
247 electric potential in the reaction mix in real time. We successfully discriminated between

248 COVID-19(+) and COVID-19(-) samples in a set of synthetic samples and in a set of saliva  
249 samples spiked with synthetic SARS-CoV-2 genetic material.

250 We first characterized the baseline corresponding to negative samples, where no primers  
251 were added (supplementary material; Figure S2), As expected, the signal associated with  
252 these samples was relatively steady (average standard deviations  $\sim 10.7$ ;  $n=3$ ). We then  
253 monitored the evolution of the LAMP reactions in the negative samples containing LAMP  
254 reaction mix and primers, but no synthetic SARS-CoV-2 genetic material.

255 One of the limitations of colorimetric LAMP-based methods based on the phenol red color  
256 shift is that some degree of color change exists in samples containing no template (see also  
257 ref [27] ). This has been associated to the occurrence of non-specific amplification induced  
258 by the interaction among the LAMP primers [23,32], which often serve as templates for  
259 off-target polymerizations. In general, non-specific amplification is believed to be the main  
260 reason for false positives in LAMP colorimetric reactions.

261 Figure 4 A shows the typical profile of the progression of the electric potential in negative  
262 samples (with primers, reaction mix, but no SARS-CoV-2 template). Four representative  
263 replicates are shown. The shape of the progression of the electric potential in the negative  
264 samples is highly consistent. Figure 4B presents a normalization of the four representative  
265 curves shown in Figure 4A. The curves were normalized by subtracting the initial potential  
266 value for each curve. In doing so, all curves practically collapse into an invariant shape.

267 The black line in Figure 4B depicts the average of the four curves corresponding to  
268 independently run negative samples. This profile, characteristic of negative samples, is  
269 distinguishable from that inherent to the specific amplification observed in samples that do  
270 contain SARS-CoV-2 genetic material. Figure 4C shows the trajectories of the electric

271 potential associated with positive samples containing different quantities of SARS-CoV-2  
272 synthetic genetic material (color curves).

273 **Figure 4**

274 The average progression of the electric potential in negative samples (from Figure 4B) is  
275 indicated by the gray line. The potential exhibits a distinctive, practically immediate, and  
276 sharp increase at the incubation conditions that are associated with a high initial rate of  
277 amplification. The initial slope of the potential curve is steeper in positive samples than in  
278 negative samples. However, a high sampling rate is required in the monitoring device for a  
279 clear identification of this steep initial slope. In our experiments, we achieved the resolution  
280 needed to identify the sharp slope associated with samples that contained SARS-CoV-2  
281 genetic material by sampling at least once per second (the Arduino code is available in  
282 supplementary material; File S1). Lower sampling rates (e.g., 0.2 Hz) do not serve the  
283 purpose of clearly resolving the initial slope of the reaction in positive samples  
284 (supplementary material; Figure S3). We also observed that the evolution of each curve is  
285 consistent with the copy load in the positive samples, so that higher copy numbers originate  
286 curves with a higher initial slope than is observed for curves associated with lower loads.  
287 Since the initial rate of amplification is remarkably high in positive samples ( $> 25$  to  $75$   
288  $\text{mV s}^{-1}$ ), the differences between slopes can be clearly established only if high sampling  
289 rates ( $\sim 1 \text{ sample s}^{-1}$ ; 1 Hz) are imposed.

290 In general, discrimination in positive samples between negative samples and positive  
291 samples with medium to high viral loads (i.e., at least 100 copies) by comparison of the  
292 potential trajectories. However, samples containing a low copy number (i.e., less than 10  
293 gene copies) cannot be distinguished from negative samples by only comparing trajectories

294 (Figure 4C). The inset in Figure 4C zooms in on the first five minutes of the amplification  
295 reaction and shows that the behavior of the trajectory of the amplification reaction in  
296 positive and negative samples can be better discriminated at this first stage of the  
297 amplification. For instance, the value of the area under the curve or of  $\Delta P$  versus  $t$  is  
298 distinguishably higher in positive samples than in negative samples during the first stage of  
299 the amplification. Here, we define  $IP_3$ , the integral of the potential with respect to time for  
300 the first 3 minutes of reaction, as an indicator of specific amplification of genetic material  
301 in the LAMP reactions (equation 1).

$$302 \quad IP_3 = \int \Delta P^* dt \Big|_{3\text{min}} \quad \text{equation (1)}$$

$$303 \quad \Delta P^* = (\Delta P_i - \Delta P_o) \quad \text{equation (2)}$$

304 Here,  $\Delta P_i$  is the value of electric potential measured at every sampling point and  $\Delta P_o$  is the  
305 value of electric potential at the beginning of the experiment. Therefore  $\Delta P^*$  is the  
306 increment in potential measured at each sampling event (i.e., in our case, every second)  
307 with respect to the initial value of electric potential in the reaction mix at the initial point of  
308 the amplification. Equation 3 provides a step by step approximation of  $IP_3$ .

$$309 \quad IP_3 \sim \sum_{i \text{ to } n} (\Delta P^*)_i (\Delta t) \quad \text{equation (3)}$$

310 Here,  $n$  is the number of sampling points within the time frame from 0 to 3 minutes.  
311 Indeed, we found that  $IP_3$  is a reliable and robust predictor that enables the consistent and  
312 rapid identification of samples containing (or not containing) SARS-CoV-2 genetic  
313 material. Figure 4C shows the evolution of the integral of  $IP_3$  for the first 3 minutes of a set  
314 of LAMP reactions. Progressions corresponding to samples added with different quantities  
315 of synthetic genetic material (i.e., 10, 100, 1000, and 10000 copies of the N gene of SARS-

316 CoV-2) were compared versus three independent repeats of negative samples (i.e., samples  
317 without SARS-CoV-2 genetic material). Negative samples (plotted in yellow) exhibit  
318 integrals significantly lower than those calculated from the analysis of positive samples. In  
319 addition, a linear correlation can be established between the logarithm of the copy number  
320 and the value of the integral (Figure 4D; inset). These results suggest that  $IP_3$  is a reliable  
321 and quantitative indicator of the specific amplification of genetic material in simple  
322 samples.

### 323 **qLAMP in saliva samples**

324 We then extended the use of this embodiment of qLAMP to the identification of SARS-  
325 CoV-2 genetic material in saliva samples. As already mentioned, colorimetric LAMP using  
326 phenol red has recently received attention as a cost-effective diagnostic method that enables  
327 discrimination between COVID(+) and COVID(-) samples by naked eye inspection and is  
328 therefore independent of the use of costly PCR instruments[11,33].

329 However, colorimetric LAMP exhibits its own important limitations, and its direct  
330 implementation in saliva samples is technically challenging. Human saliva exhibits a wide  
331 range of pH values[34,35]; therefore, even small volumes of saliva may significantly affect  
332 the initial pH of the reaction mix in LAMP-based methods. Acidic saliva samples may  
333 induce a premature shift in the pH (and the color) that is not associated with amplification  
334 and will eventually lead to a false positive diagnosis. The direct and real-time reading of  
335 electric potential throughout the amplification offers a solution to some of the limitations of  
336 final-point colorimetric LAMP methods in the context of the analysis of saliva samples.

337 Figure 5A shows the results of the progression of LAMP amplification in saliva samples  
338 with or without added synthetic genetic material in different quantities (i.e., in the range of

339 10 to 10,000 copies of the N gene of SARS-CoV-2). In this experimental set, the reaction  
340 mix contained 3–4  $\mu$ L of real undiluted saliva (volume defined based in ref [15] ) from  
341 SARS-CoV-2 negative volunteers (as determined by end-point colorimetric LAMP). As  
342 before, the amplification curves that corresponded to samples spiked with SARS-CoV-2  
343 genetic material exhibited a steep slope that was immediately observable upon initiation of  
344 the incubation. The typical smoother progression associated with negative samples (Figure  
345 4B) was also observed in negative saliva samples. In Figure 5B, we have plotted the results  
346 from a set of experiments in which the  $IP_3$  values for saliva samples with or without SARS-  
347 CoV-2 genetic material were calculated. The  $IP_3$  values were clearly higher in positive  
348 samples than in negative samples. The positive samples with low to medium SARS-CoV-2  
349 gene copy loads were also clearly distinguishable from negative samples.

350

### Figure 5

351 The  $IP_3$  value is an indicator of the extent of specific amplification that is somehow  
352 analogous to the progression of the change of color (from red-magenta to crisp yellow;  
353 Figure 5C) during the amplification in colorimetric LAMP. Indeed, the use of a commercial  
354 color sensor allows the quantitative analysis of the process of the color change during  
355 colorimetric LAMP[36] mediated by phenol red, as we and others have shown previously  
356 [11,37] (supplementary material; Figure S4). For comparison, we monitored online the  
357 change in color associated with the process of amplification in samples that contained  
358 different quantities of SARS-CoV-2 genetic material (Figure 5D).

359 Note that the shape of the curves that describes the change in color and the change in  
360 potential are similar. This is expected. Both processes (i.e., the change in electric potential  
361 in the reaction mix and the development of color) are cumulative processes directly related



362 to the release of protons during amplification. However, the time scale at which color and  
363 electric potential evolve differs quite drastically. Changes in color are observable at a much  
364 slower rate—positive and negative samples can be discriminated due to their color  
365 evolution within the first 30 minutes of reaction (supplementary material; Figure S4 A and  
366 C). Remarkably, the evolution of the IP<sub>3</sub> indicator introduced here enables a reliable  
367 discrimination between positive and negative samples within the initial 3 minutes of the  
368 reaction.

### 369 **Potential relevance and limitations**

370 The result presented here may be highly relevant in practical terms. The typical  
371 concentration of gene copies of SARS-CoV-2 in the saliva of positive subjects (even  
372 asymptomatic ones) is generally higher than 10<sup>5</sup> mL<sup>-1</sup> (10<sup>3</sup> μL<sup>-1</sup>). In the analysis presented  
373 here, 3–4 μL<sup>-1</sup> of undiluted saliva can be added without observing inhibitory effects in  
374 terms of the extent of the amplification. Therefore, copy number values greater than 10<sup>3</sup> per  
375 assay can be expected. Based on our experiments, the limit of detection/discrimination of  
376 this method, assisted by online monitoring of the electric potential of the solution during  
377 amplification, is two orders of magnitude below this (i.e., 10–100 SARS-CoV-2 copies per  
378 assay). This suggests that this method could render reliable diagnostic results for diagnosis  
379 of COVID-19 in unextracted (undiluted or diluted) saliva samples that have even moderate  
380 or low viral loads. This hypothesis remains to be tested by the diagnostic evaluation of  
381 saliva samples from actual patients and at this point should be taken as an inference.

382 Several limitations of the methodology presented here should also be noted. The successful  
383 performance of this diagnostic strategy is centered on the ability to sample the electric  
384 potential (or pH) of the reaction mix frequently (the authors recommend at least at 1.0 Hz)

385 during the initial stage of the amplification reaction (i.e., at least during the initial three  
386 minutes). Therefore, this requires an electrode with a sufficiently fast response and a sensor  
387 capable of operating at a sufficiently high sampling rate (at least one pH measurement per  
388 second). In addition, equilibration of the electrode at the typical initial pH (or potential) of  
389 the LAMP reaction mix is desirable. Failure to do this may hinder the resolution of the  
390 readings during the first seconds of the amplification due to a lag in the response or the  
391 adjustment of the sensor to the pH conditions (supplementary material; Figure S3).

392 In the current developmental state of our diagnostic device, we depend on the use of  
393 commercial pH microelectrodes that are relatively expensive. For instance, we estimate that  
394 the cost of development a diagnostic unit capable of running 8 reactions simultaneously in  
395 our lab would be on the order of 10,000 USD. In addition, the use of glass or membrane-  
396 based pH microelectrodes may be a source of contamination of samples with residual DNA  
397 (from a previous positive amplification). Protocols should be established that can  
398 effectively remove residual nucleic acids after the completion of an amplification  
399 experiment from the electrode. The development of disposable and low-cost pH  
400 microelectrodes should be a priority for enabling the cost-effective use of this strategy to  
401 intensify the ability to perform label-free and portable/mobile molecular diagnostics of  
402 SARS-CoV-2 and other pathogens.

## 403 **Conclusions and outlook**

404 Preparedness to face infectious diseases is the key to buffering the spread of epidemics and  
405 minimizing the number of human deaths. Extraction-free and portable diagnostics from  
406 saliva will greatly enable the intensification of testing efforts in the context of pandemic  
407 COVID-19 and other infectious diseases.

408 Here, we have introduced a strategy for reliable and consistent identification of samples  
409 containing SARS-CoV-2 genetic material. This strategy relies on the real-time monitoring  
410 of the LAMP reaction in the weakly buffered reaction mix commonly used for colorimetric  
411 LAMP. The continuous release of protons associated with the incorporation of bases into  
412 the nascent chains of DNA during amplification is measured online with a pH  
413 microelectrode that is immersed in the reaction mix incubated at 62.5 °C. We also showed  
414 that proper isothermal control and online determination of changes in potential (or pH) in  
415 the LAMP reaction mix can be appropriately accomplished using a simple Arduino-based  
416 device.

417 In addition, we demonstrate that the area under the curve that describes the time evolution  
418 of the values of the electric potential of the reaction mix during the first three minutes of  
419 the amplification (i.e., defined here as  $IP_3$ ) is a reliable predictor of the extent of specific  
420 amplification occurring during the LAMP reactions. The evaluation of  $IP_3$  enables the  
421 consistent discrimination between samples containing or not containing SARS-CoV-2  
422 genetic material. We also demonstrated the feasibility of using this portable, fast, and  
423 reliable diagnostic strategy with saliva samples containing different loads of SARS-CoV-2  
424 genetic material.

425 Recent reports have shown that the performance of LAMP is greatly influenced by the  
426 reaction conditions and the reagents used (i.e., primers sets, retro-transcriptases or  
427 proteases, additives, and fluorescent dyes, among others) [17,38]. The label-free qLAMP  
428 platform presented here may be highly useful in the selection of reaction reagents (i.e.,  
429 alternative polymerases, additives to enhance the amplification, or primer sets) or  
430 optimization of LAMP conditions (i.e., temperatures and concentrations). The mere

431 comparison of the curves of evolution of protons with time under different reaction  
432 conditions provides a direct way to evaluate the effect of any modifications in the protocol  
433 on the overall performance of the amplification.

434 The release of protons during amplification, which is the underlying process that we are  
435 monitoring, is inherent in all nucleic acid amplification methods. Therefore, the  
436 methodology of real-time monitoring of the change in electric potential during  
437 amplification is fully translatable to other amplification schemes (i.e., qPCR and RPA,  
438 among others).

439

## 440 **Acknowledgments**

441 EGG and SB acknowledge funding from doctoral scholarship provided by CONACyT  
442 (Consejo Nacional de Ciencia y Tecnología, México). GTdS and MMA acknowledge the  
443 institutional funding received from Tecnológico de Monterrey (Grant 002EICIS01 and  
444 Novus 2019) and CONACyT (Sistema Nacional de Investigadores; 66839 and 26048). The  
445 authors acknowledge the funding provided by the Federico Baur Endowed Chair in  
446 Nanotechnology (0020240I03). The authors gratefully acknowledge funding from  
447 Fundación-FEMSA and from an alumnus of Tecnológico de Monterrey who prefers to  
448 remain anonymous.

## 449 **CRedit author statement**

450 **Mario Moisés Alvarez:** Conceptualization, Methodology, Investigation, Formal Analysis,  
451 Resources, Software, Data curation, Writing - original draft, Writing-Reviewing & Editing,  
452 Supervision, Project Administration, Funding acquisition; **Sergio Bravo-González:**

453 Methodology, Investigation, Data curation, Software; **Everardo González-González:**  
454 Methodology, Investigation, Resources; **Grissel Trujillo-de Santiago:** Conceptualization,  
455 Methodology, Resources, Writing-Reviewing & Editing, Supervision, Project  
456 Administration, Funding acquisition.

457

## 458 **Competing interest**

459 The authors declare no competing interests.

460

461

462

463

464

465

466

467

468

469

470

471

472

473

474

475

476

477

478 **Figures and captions:**

479

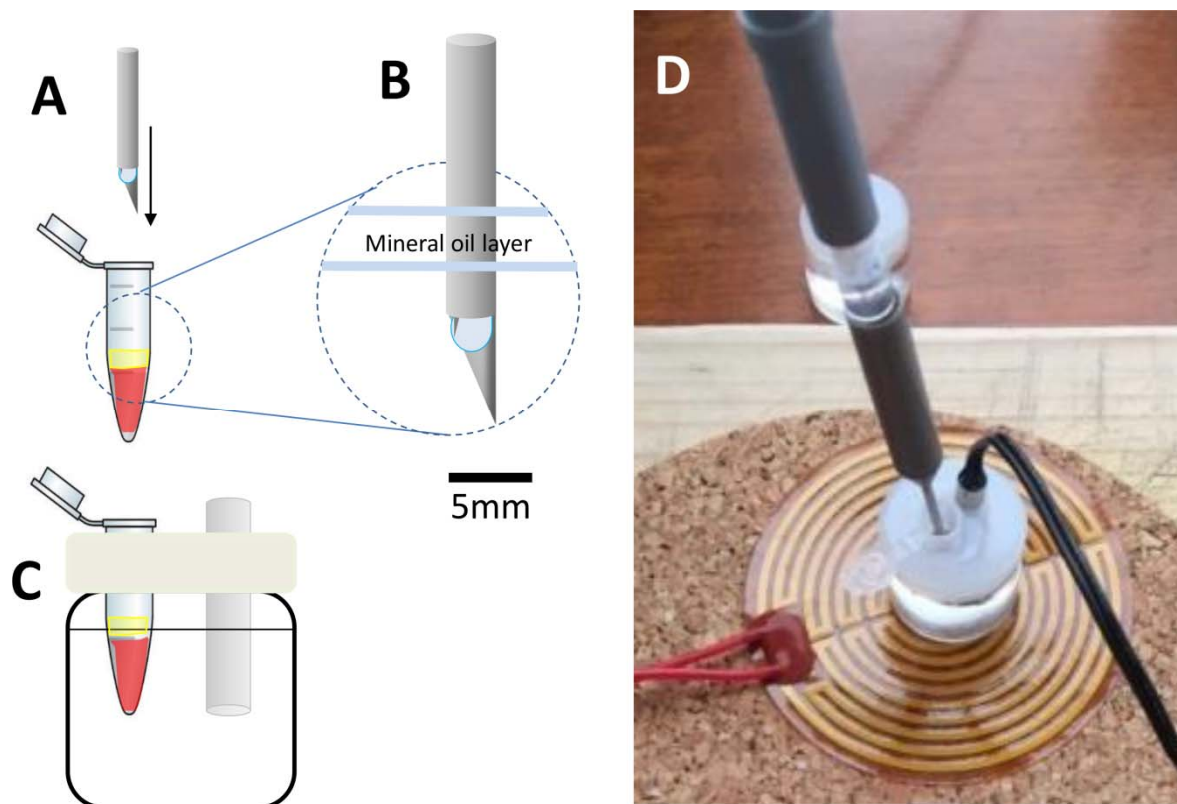

480

481 **Figure 1.** Experimental setup. (A) A micro pH electrode is inserted into the Loop-mediated  
482 Isothermal Amplification (LAMP) colorimetric reaction mix and (B) a thin layer of oil is added  
483 to avoid evaporation during incubation (C) in an oil bath. (D) Image of the actual system; a heating  
484 mat connected to an Arduino-based proportional integral derivative (PID) controller is used to  
485 control the temperature at  $62.5 \pm 1.2$  °C.

486

487

488

489

490

491

492

493

494

495

496

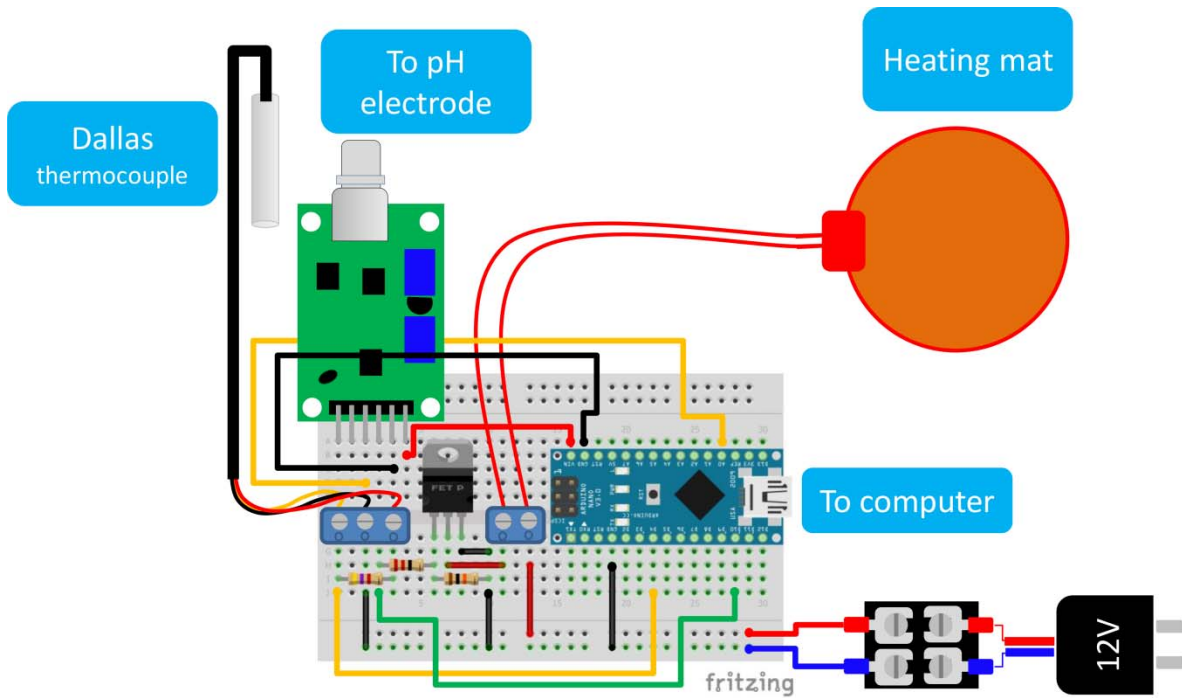

497

498 **Figure 2.** Schematic representation of the Arduino-based proportional integral derivative (PID)  
499 temperature controller and online electric potential monitoring system.

500

501

502

503

504

505

506

507

508

509

510

511

512

513

514

515

516

517  
518  
519  
520  
521  
522  
523  
524  
525

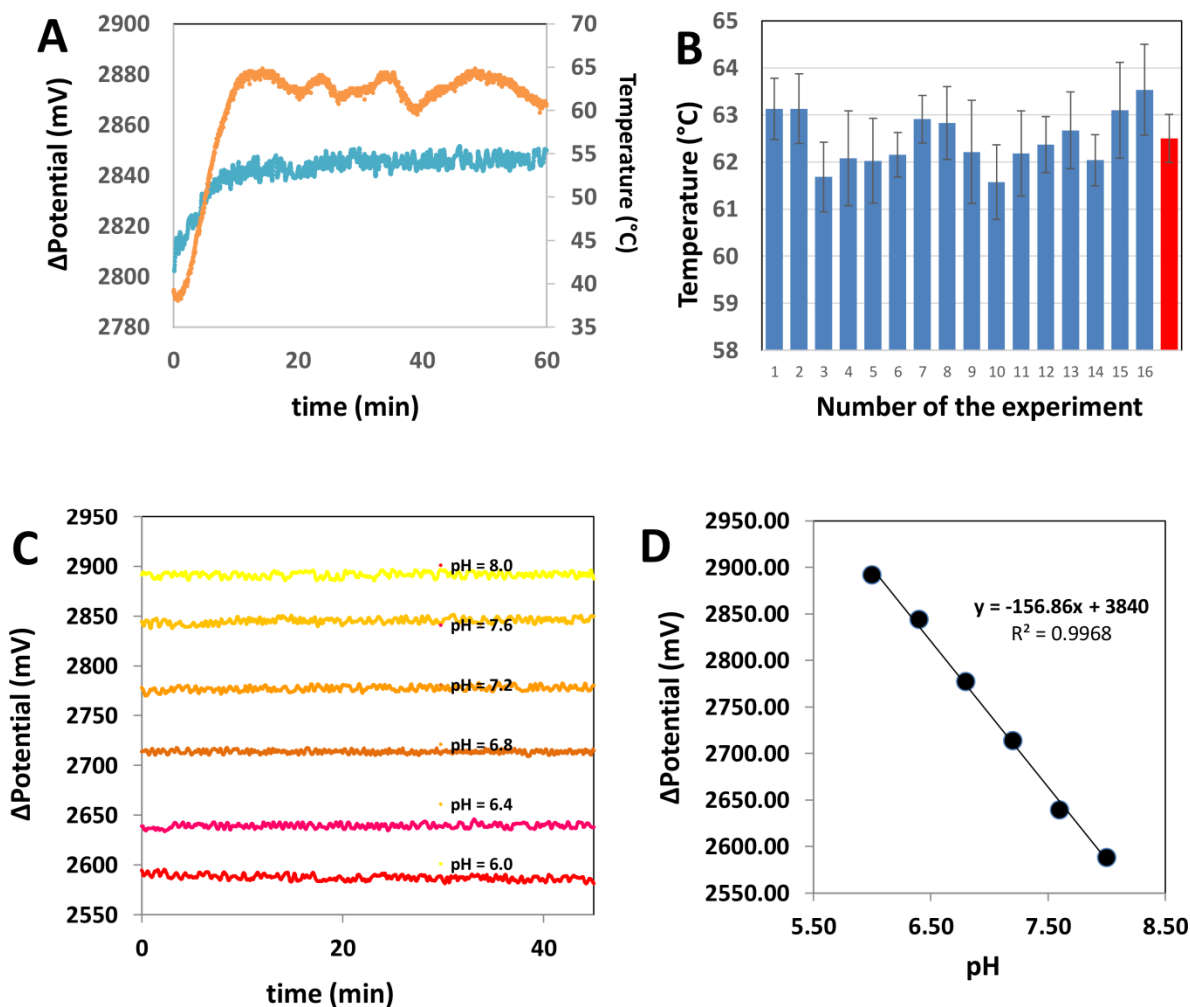

526  
527  
528  
529  
530  
531  
532  
533  
534  
535  
536  
537  
538

**Figure 3.** Basic characterization of the electric potential monitoring system and the Arduino-based proportional integral derivative (PID) controller. (A) The potential signal is stable at different pH values. (B) A linear dependence between pH and potential differential was observed in the entire range of pH values relevant to the Loop-mediated Isothermal Amplification (LAMP) reaction. (C) The potential differential is stable at isothermal conditions. (D) The Arduino-based PID controller is able to maintain the temperature value around the set point value (62.5 +/- 0.5° C) in a set of 16 independent experiments. The red bar indicates the average temperature and standard deviations of this set of 16 independent experiments.



539

540

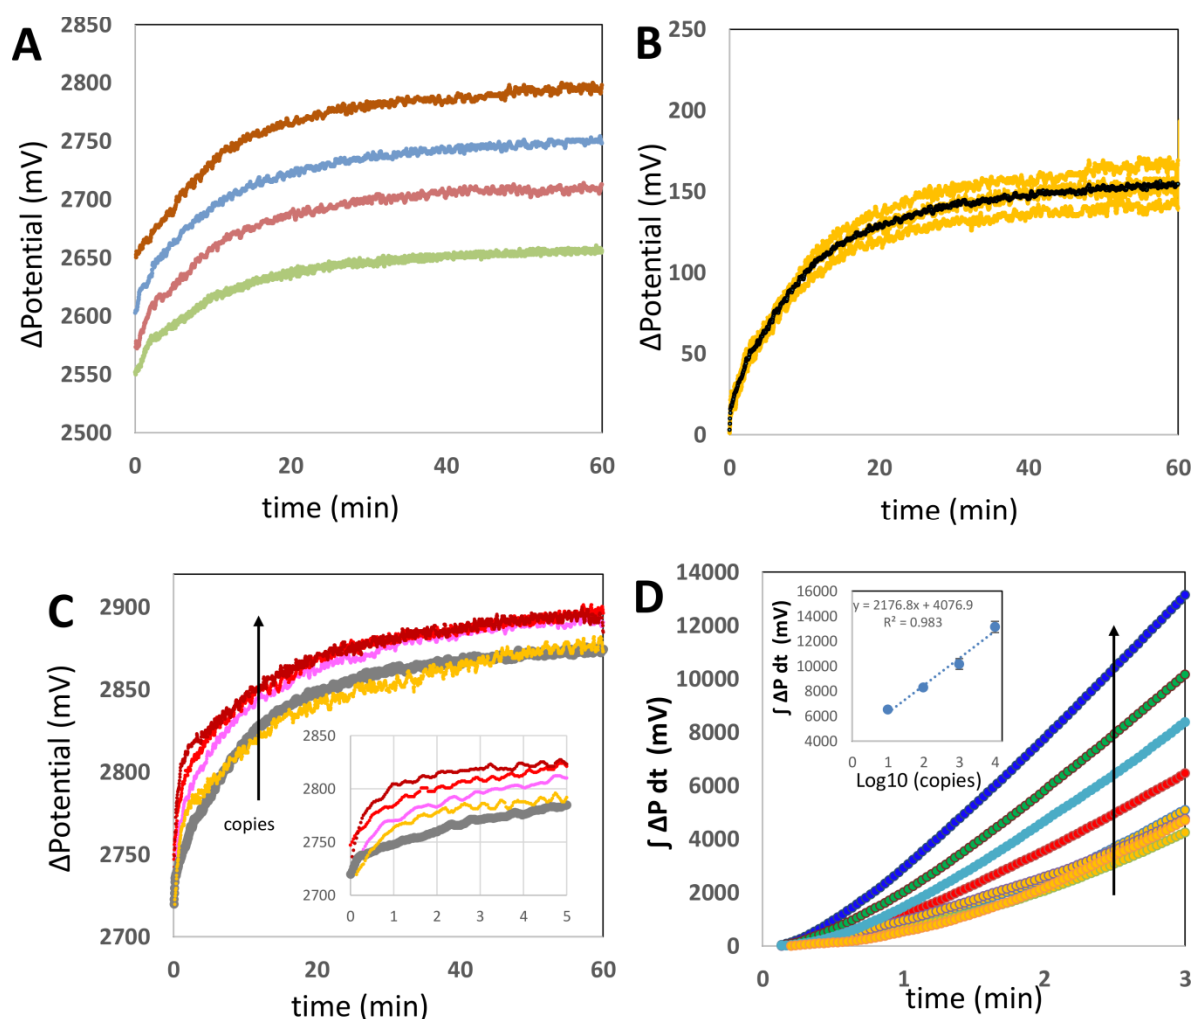

541

542 **Figure 4.** Discrimination between SARS-CoV-2 positive and negative samples using online  
543 electric potential measurements. (A) Measurement of four different negative samples (i.e., samples  
544 without SARS-CoV-2 genetic material, but containing reaction mix and primers). (B) Normalized  
545 signal of a set of four different negative samples indicated with yellow lines. Values were  
546 normalized by subtracting the initial potential value of each curve. The black line depicts the  
547 average of the four yellow trajectories and is characteristic of the progression of the Loop-  
548 mediated Isothermal Amplification (LAMP) reaction observed in negative samples. (C)  
549 Comparison of the online potential signal in samples containing 10,000 (magenta), 1000 (red), 100  
550 (pink), and 10 (yellow) copies of synthetic SARS-CoV-2 genetic material. The average of four  
551 negative samples is depicted in gray. The inset shows a close-up of the first five minutes of the  
552 amplification reaction. (D) Plot of the integral of the differential of potential with respect to time  
553 for the first 3 minutes of amplification in samples containing different copy numbers of synthetic  
554 SARS-CoV-2 genetic material: 10,000 (dark blue), 1000 (brown), 100 (light blue), and 10 (red)  
555 copies of synthetic SARS-CoV-2 genetic material. Trends associated with negative samples are  
556 presented in blue, orange, green, and yellow.  
557

558  
559  
560  
561  
562

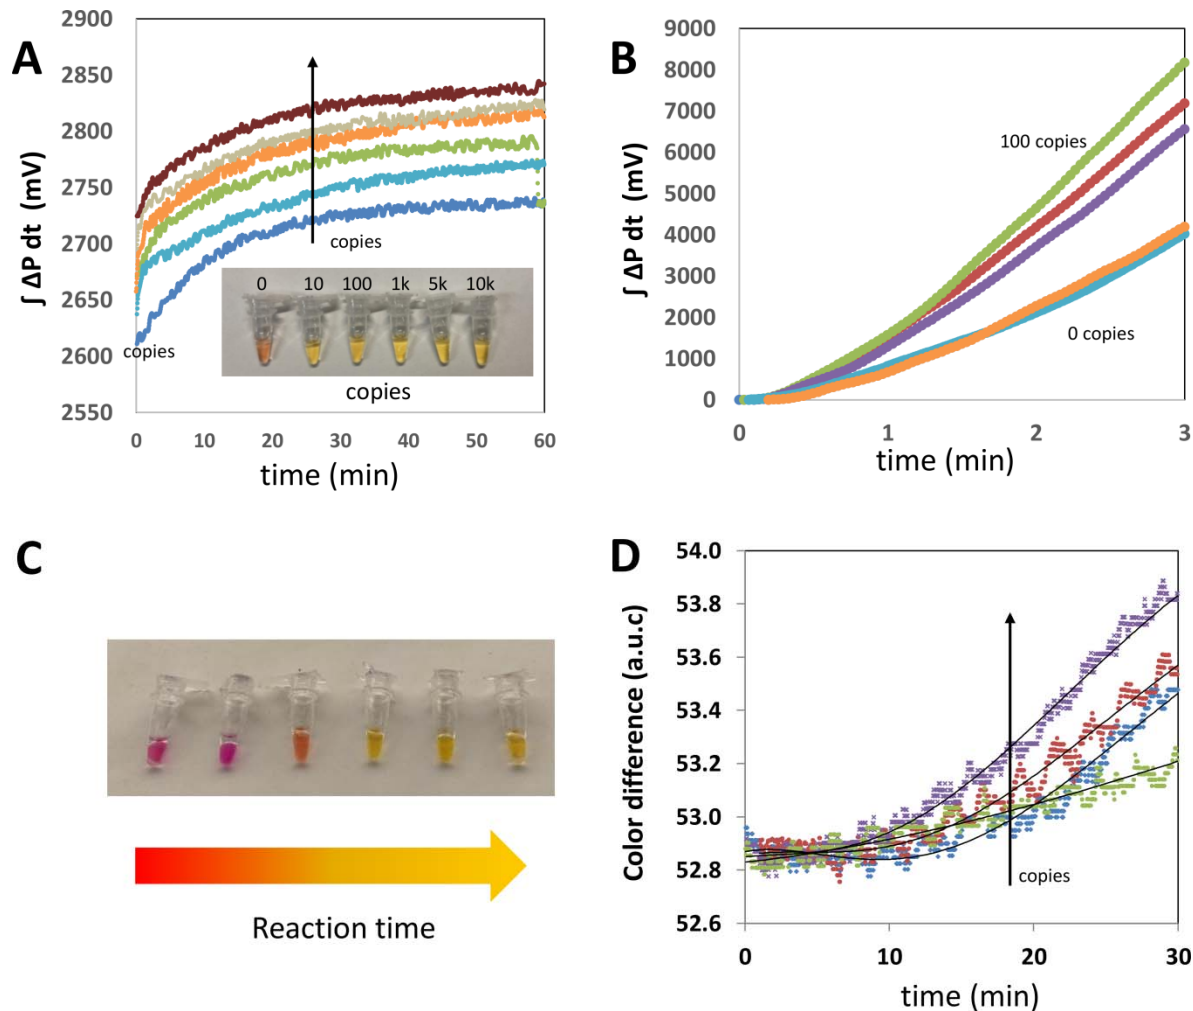

563  
564  
565  
566  
567  
568  
569  
570  
571  
572  
573  
574  
575  
576  
577  
578  
579

**Figure 5.** Discrimination between SARS-CoV-2 positive and negative saliva samples using online electric potential measurements. (A) Results from the online evaluation of electric potential in a saliva sample from a volunteer diagnosed as SARS-CoV-2 negative (dark blue curve) and a set of five saliva samples added with 10 (blue line), 100 (green line), 1000 (orange curve), 5000 (beige curve), and 10000 copies (brown curve) of SARS-CoV-2 genetic material. (B) Plot of the integral of the differential of potential with respect to time for the first 3 minutes of amplification in saliva samples containing different copy numbers of synthetic SARS-CoV-2 genetic material in the range of 10–100 copies (purple, green and red curves) or not containing SARS-CoV-2 genetic material (orange and blue curves). The blue curve corresponds to the analysis of an actual sample from a symptomatic patient later confirmed as SARS-CoV-2 negative by RT-qPCR. (C) Typical color progression (from red-magenta to crisp yellow in a positive sample) through colorimetric Loop-mediated Isothermal Amplification (LAMP). (D) Evolution of the difference in color (with respect to the initial red-magenta color) in positive samples containing 0 (green), 10 (blue), 100 (red), and 1000 (purple) added synthetic copies of SARS-CoV-2 genetic material.

580  
581  
582  
583

584  
585

586 **Table 1.** Sequences of the Loop-mediated Isothermal Amplification (LAMP) primers used  
587 for the detection of segments of genetic material encoding for the expression of the N  
588 protein of SARS-CoV-2.

589  
590

| <b>Set</b>          | <b>Description</b> | <b>Primers Sequence (5'&gt;3')</b> |
|---------------------|--------------------|------------------------------------|
| Primer set $\alpha$ | 2019-nCoV 1-F3     | <i>TGGACCCCAAAATCAGCG</i>          |
|                     | 2019-nCoV 1-B3     | <i>GCCTTGTCCTCGAGGGAAT</i>         |
|                     | 2019-nCoV 1-FIP    | <i>CCACTGCGTTCTCCATTCTGGTAAATG</i> |
|                     |                    | <i>CACCCCGCATTACG</i>              |
|                     | 2019-nCoV 1-BIP    | <i>CGCGATCAAAAACAACGTCGGCCCTTG</i> |
|                     |                    | <i>CCATGTTGAGTGAGA</i>             |
|                     | 2019-nCoV 1-LF     | <i>TGAATCTGAGGGTCCACCAA</i>        |
|                     | 2019-nCoV 1-LB     | <i>TTACCCAATAATACTGCGTCTTGGT</i>   |

591  
592  
593  
594  
595  
596  
597

## 598 **References**

- 599 [1] Home - Johns Hopkins Coronavirus Resource Center, (n.d.). <https://coronavirus.jhu.edu/>  
600 (accessed September 10, 2020).
- 601 [2] M.N. Esbin, O.N. Whitney, S. Chong, A. Maurer, X. Darzacq, R. Tjian, Overcoming the  
602 bottleneck to widespread testing: A rapid review of nucleic acid testing approaches for  
603 COVID-19 detection, *RNA*. 26 (2020) 771–783. doi:10.1261/rna.076232.120.
- 604 [3] N. Younes, D.W. Al-Sadeq, H. AL-Jighefee, S. Younes, O. Al-Jamal, H.I. Daas, H.M.  
605 Yassine, G.K. Nasrallah, Challenges in Laboratory Diagnosis of the Novel Coronavirus  
606 SARS-CoV-2, *Viruses*. 12 (2020) 582. doi:10.3390/v12060582.
- 607 [4] M.P. Cheng, J. Papenburg, M. Desjardins, S. Kanjilal, C. Quach, M. Libman, S. Dittrich,  
608 C.P. Yansouni, Diagnostic Testing for Severe Acute Respiratory Syndrome-Related  
609 Coronavirus 2: A Narrative Review, *Ann. Intern. Med.* 172 (2020) 726–734.  
610 doi:10.7326/M20-1301.
- 611 [5] C.B.F. Vogels, A.F. Brito, A.L. Wyllie, J.R. Fauver, I.M. Ott, C.C. Kalinich, M.E. Petrone,

- 612 A. Casanovas-Massana, M. Catherine Muenker, A.J. Moore, J. Klein, P. Lu, A. Lu-Culligan,  
613 X. Jiang, D.J. Kim, E. Kudo, T. Mao, M. Moriyama, J.E. Oh, A. Park, J. Silva, E. Song, T.  
614 Takahashi, M. Taura, M. Tokuyama, A. Venkataraman, O. El Weizman, P. Wong, Y. Yang,  
615 N.R. Cheemarla, E.B. White, S. Lapidus, R. Earnest, B. Geng, P. Vijayakumar, C. Odio, J.  
616 Fournier, S. Bermejo, S. Farhadian, C.S. Dela Cruz, A. Iwasaki, A.I. Ko, M.L. Landry, E.F.  
617 Foxman, N.D. Grubaugh, Analytical sensitivity and efficiency comparisons of SARS-CoV-2  
618 RT-qPCR primer-probe sets, *Nat. Microbiol.* 5 (2020) 1299–1305. doi:10.1038/s41564-  
619 020-0761-6.
- 620 [6] J.M. Sharfstein, S.J. Becker, M.M. Mello, Diagnostic Testing for the Novel Coronavirus,  
621 *JAMA - J. Am. Med. Assoc.* 323 (2020) 1437–1438. doi:10.1001/jama.2020.3864.
- 622 [7] A.K. Giri, D.R. Rana, Charting the challenges behind the testing of COVID-19 in  
623 developing countries: Nepal as a case study, *Biosaf. Heal.* 2 (2020) 53–56.  
624 doi:10.1016/j.bsheal.2020.05.002.
- 625 [8] L. Yu, S. Wu, X. Hao, X. Dong, L. Mao, V. Pelechano, W.-H. Chen, X. Yin, Rapid  
626 Detection of COVID-19 Coronavirus Using a Reverse Transcriptional Loop-Mediated  
627 Isothermal Amplification (RT-LAMP) Diagnostic Platform, *Clin. Chem.* 66 (2020) 975–  
628 977. doi:10.1093/clinchem/hvaa102.
- 629 [9] L.E. Lamb, S.N. Bartolone, E. Ward, M.B. Chancellor, Rapid Detection of Novel  
630 Coronavirus (COVID19) by Reverse Transcription-Loop-Mediated Isothermal  
631 Amplification, *SSRN Electron. J.* (2020). doi:10.2139/ssrn.3539654.
- 632 [10] Y. Zhang, N. Odiwuor, J. Xiong, L. Sun, R.O. Nyaruaba, H. Wei, N.A. Tanner, Rapid  
633 Molecular Detection of SARS-CoV-2 (COVID-19) Virus RNA Using Colorimetric LAMP,  
634 *MedRxiv.* 2 (2020) 2020.02.26.20028373. doi:10.1101/2020.02.26.20028373.
- 635 [11] E. González-González, I.M. Lara-Mayorga, I.P. Rodríguez-Sánchez, Y.S. Zhang, S.O.  
636 Martínez-Chapa, G.T. Santiago, M.M. Alvarez, Colorimetric loop-mediated isothermal  
637 amplification (LAMP) for cost-effective and quantitative detection of SARS-CoV-2: the  
638 change in color in LAMP-based assays quantitatively correlates with viral copy number,  
639 *Anal. Methods.* 13 (2021) 169–178. doi:10.1039/d0ay01658f.
- 640 [12] J. Rodriguez-Manzano, K. Malpartida-Cardenas, N. Moser, I. Pennisi, M. Cavuto, L.  
641 Miglietta, A. Moniri, R. Penn, G. Satta, P. Randell, F. Davies, F. Bolt, W. Barclay, A.  
642 Holmes, P. Georgiou, Handheld Point-of-Care System for Rapid Detection of SARS-CoV-2  
643 Extracted RNA in under 20 min, *ACS Cent. Sci.* (2021). doi:10.1021/acscentsci.0c01288.
- 644 [13] X. Zhu, X. Wang, L. Han, T. Chen, L. Wang, H. Li, S. Li, L. He, X. Fu, S. Chen, M. Xing,  
645 H. Chen, Y. Wang, Multiplex reverse transcription loop-mediated isothermal amplification

- 646 combined with nanoparticle-based lateral flow biosensor for the diagnosis of COVID-19,  
647 Biosens. Bioelectron. 166 (2020) 112437. doi:10.1016/j.bios.2020.112437.
- 648 [14] N. Toppings, A. Mohon, Y. Lee, H. Kumar, D. Lee, R. Kapoor, G. Singh, L. Oberding, O.  
649 Abdullah, K. Kim, B. Berenger, D. Pillai, Saliva-Dry LAMP: A Rapid Near-Patient  
650 Detection System for SARS-CoV-2, (n.d.). doi:10.21203/rs.3.rs-141322/v1.
- 651 [15] M.A. Lalli, J.S. Langmade, X. Chen, C.C. Fronick, C.S. Sawyer, L.C. Burcea, M.N.  
652 Wilkinson, R.S. Fulton, M. Heinz, W.J. Buchser, R.D. Head, R.D. Mitra, J. Milbrandt,  
653 Rapid and Extraction-Free Detection of SARS-CoV-2 from Saliva by Colorimetric Reverse-  
654 Transcription Loop-Mediated Isothermal Amplification, Clin. Chem. 67 (2021) 415–424.  
655 doi:10.1093/clinchem/hvaa267.
- 656 [16] B.A. Rabe, C. Cepko, SARS-CoV-2 detection using isothermal amplification and a rapid,  
657 inexpensive protocol for sample inactivation and purification, Proc. Natl. Acad. Sci. U. S. A.  
658 117 (2020) 24450–24458. doi:10.1073/pnas.2011221117.
- 659 [17] A. Alekseenko, D. Barrett, Y. Pareja-Sanchez, R.J. Howard, E. Strandback, H. Ampah-  
660 Korsah, U. Rovšnik, S. Zuniga-Veliz, A. Klenov, J. Malloo, S. Ye, X. Liu, B. Reinius, S.J.  
661 Elsässer, T. Nyman, G. Sandh, X. Yin, V. Pelechano, Direct detection of SARS-CoV-2  
662 using non-commercial RT-LAMP reagents on heat-inactivated samples, Sci. Rep. 11 (2021)  
663 1820. doi:10.1038/s41598-020-80352-8.
- 664 [18] N. L'Helgouach, P. Champigneux, F.S. Schneider, L. Molina, J. Espeut, M. Alali, J.  
665 Baptiste, L. Cardeur, B. Dubuc, V. Foulongne, F. Galtier, A. Makinson, G. Marin, M.C.  
666 Picot, A. Prioux-Lejeune, M. Quenot, F.C. Robles, N. Salvetat, D. Vetter, J. Reynes, F.  
667 Molina, EasyCOV: LAMP based rapid detection of SARS-CoV-2 in saliva, MedRxiv.  
668 (2020) 2020.05.30.20117291. doi:10.1101/2020.05.30.20117291.
- 669 [19] E. González-González, I.M. Lara-Mayorga, I.P. Rodríguez-Sánchez, Y.S. Zhang, S.O.  
670 Martínez-Chapa, G. Trujillo de Santiago, M.M. Alvarez, Colorimetric Loop-mediated  
671 Isothermal Amplification (LAMP) for cost-effective and quantitative detection of SARS-  
672 CoV-2: The change in color in LAMP-based assays quantitatively correlates with viral copy  
673 number., Anal. Methods. (2020). doi:10.1039/D0AY01658F.
- 674 [20] N.A. Tanner, Y. Zhang, T.C. Evans, Visual detection of isothermal nucleic acid  
675 amplification using pH-sensitive dyes, Biotechniques. 58 (2015) 59–68.  
676 doi:10.2144/000114253.
- 677 [21] M.J. Kellner, J.J. Ross, J. Schnabl, M.P.S. Dekens, R. Heinen, I. Grishkovskaya, B. Bauer, J.  
678 Stadlmann, L. Menéndez-Arias, R. Fritsche-Polanz, M. Traugott, T. Seitz, A. Zoufaly, M.  
679 Födinger, C. Wenisch, J. Zuber, A. Pauli, J. Brennecke, S. Ameres, B. Bauer, N. Beer, K.

- 680 Bergauer, W. Binder, C. Blaukopf, B. Bochev, J. Brennecke, S. Brinnich, A. Bundalo, M.  
681 Busslinger, A. Bykov, T. Clausen, L. Cochella, G. de Vries, M. Dekens, D. Drechsel, Z.  
682 Dzupinkova, M. Eckmann-Mader, U. Elling, M. Fellner, T. Fellner, L. Fin, B.V. Gapp, G.  
683 Grabmann, I. Grishkovskaya, A. Hagelkruys, B. Hajdusits, D. Haselbach, R. Heinen, L. Hill,  
684 D. Hoffmann, S. Horer, H. Isemann, R. Kalis, M. Kellner, J. Kley, T. Köcher, A. Köhler, D.  
685 Kordic, C. Krauditsch, S. Kula, R. Latham, M.C. Leitner, T. Leonard, D. Lindenhofer, R.A.  
686 Manzenreither, K. Mechtler, A. Meinhart, S. Mereiter, T. Micheler, P. Moeseneder, S.  
687 Nimpf, M. Nordborg, E. Ogris, M. Pagani, A. Pauli, J.M. Peters, P. Pjevac, C. Plaschka, M.  
688 Rath, D. Reumann, S. Rieser, M. Rocha-Hasler, A. Rodriguez, J.J. Ross, H. Scheuch, K.  
689 Schindler, C. Schmidt, H. Schmidt, J. Schnabl, S. Schüchner, T. Schwickert, A. Sommer, J.  
690 Stadlmann, A. Stark, P. Steinlein, S. Strobl, Q. Sun, W. Tang, L. Trübestein, C. Umkehrer,  
691 S. Urmosi-Incze, K. Uzunova, G. Versteeg, A. Vogt, V. Vogt, M. Wagner, M.  
692 Weissenboeck, B. Werner, R. Yelagandula, J. Zuber, A rapid, highly sensitive and open-  
693 access SARS-CoV-2 detection assay for laboratory and home testing, *BioRxiv*. (2020).  
694 doi:10.1101/2020.06.23.166397.
- 695 [22] J.C. Rolando, E. Jue, J.T. Barlow, R.F. Ismagilov, Real-time kinetics and high-resolution  
696 melt curves in single-molecule digital LAMP to differentiate and study specific and non-  
697 specific amplification, *Nucleic Acids Res.* 48 (2021) 42. doi:10.1093/NAR/GKAA099.
- 698 [23] X. Gao, B. Sun, Y. Guan, Pullulan reduces the non-specific amplification of loop-mediated  
699 isothermal amplification (LAMP), *Anal. Bioanal. Chem.* 411 (2019) 1211–1218.  
700 doi:10.1007/s00216-018-1552-2.
- 701 [24] E. Gonzalez-Gonzalez, G.T. Santiago, I.M. Lara-Mayorga, S.O. Martinez-Chapa, M.M.  
702 Alvarez, Portable and accurate diagnostics for COVID-19: Combined use of the miniPCR  
703 thermocycler and a well-plate reader for SARS-Co2 virus detection, *MedRxiv*. (2020)  
704 2020.04.03.20052860. doi:10.1101/2020.04.03.20052860.
- 705 [25] OSF Preprints | Landscape Coronavirus Disease 2019 test (COVID-19 test) in vitro -- A  
706 comparison of PCR vs Immunoassay vs Crispr-Based test, (n.d.). <https://osf.io/6eagn>  
707 (accessed April 8, 2020).
- 708 [26] J.M. Rothberg, W. Hinz, T.M. Rearick, J. Schultz, W. Mileski, M. Davey, J.H. Leamon, K.  
709 Johnson, M.J. Milgrew, M. Edwards, J. Hoon, J.F. Simons, D. Marran, J.W. Myers, J.F.  
710 Davidson, A. Branting, J.R. Nobile, B.P. Puc, D. Light, T.A. Clark, M. Huber, J.T.  
711 Branciforte, I.B. Stoner, S.E. Cawley, M. Lyons, Y. Fu, N. Homer, M. Sedova, X. Miao, B.  
712 Reed, J. Sabina, E. Feierstein, M. Schorn, M. Alanjary, E. Dimalanta, D. Dressman, R.  
713 Kasinskas, T. Sokolsky, J.A. Fianza, E. Namsaraev, K.J. McKernan, A. Williams, G.T.



- 714 Roth, J. Bustillo, An integrated semiconductor device enabling non-optical genome  
715 sequencing, *Nature*. 475 (2011) 348–352. doi:10.1038/nature10242.
- 716 [27] D. Gosselin, M. Gougis, M. Baque, F.P. Navarro, M.N. Belgacem, D. Chaussy, A.G.  
717 Bourdat, P. Mailley, J. Berthier, Screen-Printed Polyaniline-Based Electrodes for the Real-  
718 Time Monitoring of Loop-Mediated Isothermal Amplification Reactions, *Anal. Chem.* 89  
719 (2017) 10124–10128. doi:10.1021/acs.analchem.7b02394.
- 720 [28] D. Han, R. Chand, Y.S. Kim, Microscale loop-mediated isothermal amplification of viral  
721 DNA with real-time monitoring on solution-gated graphene FET microchip, *Biosens.*  
722 *Bioelectron.* 93 (2017) 220–225. doi:10.1016/j.bios.2016.08.115.
- 723 [29] C. Toumazou, L.M. Shepherd, S.C. Reed, G.I. Chen, A. Patel, D.M. Garner, C.J.A. Wang,  
724 C.P. Ou, K. Amin-Desai, P. Athanasiou, H. Bai, I.M.Q. Brizido, B. Caldwell, D. Coomber-  
725 Alford, P. Georgiou, K.S. Jordan, J.C. Joyce, M. La Mura, D. Morley, S. Sathyavruthan, S.  
726 Temelso, R.E. Thomas, L. Zhang, Simultaneous DNA amplification and detection using a  
727 pH-sensing semiconductor system, *Nat. Methods*. 10 (2013) 641–646.  
728 doi:10.1038/nmeth.2520.
- 729 [30] S. Xie, Y. Yuan, Y. Song, Y. Zhuo, T. Li, Y. Chai, R. Yuan, Using the ubiquitous pH meter  
730 combined with a loop mediated isothermal amplification method for facile and sensitive  
731 detection of *Nosema bombycis* genomic DNA PTP1, *Chem. Commun.* 50 (2014) 15932–  
732 15935. doi:10.1039/c4cc06449f.
- 733 [31] E. González-González, G. Trujillo-de Santiago, I.M. Lara-Mayorga, S.O. Martínez-Chapa,  
734 M.M. Alvarez, Portable and accurate diagnostics for COVID-19: Combined use of the  
735 miniPCR thermocycler and a well-plate reader for SARS-CoV-2 virus detection, *PLoS One*.  
736 15 (2020) e0237418. doi:10.1371/journal.pone.0237418.
- 737 [32] Y.-P. Wong, S. Othman, Y.-L. Lau, S. Radu, H.-Y. Chee, Loop-mediated isothermal  
738 amplification (LAMP): a versatile technique for detection of micro-organisms, *J. Appl.*  
739 *Microbiol.* 124 (2018) 626–643. doi:10.1111/jam.13647.
- 740 [33] K. Nawattanapaiboon, E. Pasomsub, P. Prombun, A. Wongbunmak, A. Jenjitwanich, P.  
741 Mahasupachai, P. Vetcho, C. Chayrach, N. Manatjaroenlap, C. Samphaongern, T.  
742 Watthanachockchai, P. Leedorkmai, S. Manopwisedjaroen, R. Akkarawongsapat, A.  
743 Thitithanyanont, M. Phanchana, W. Panbangred, S. Chauvatcharin, T. Sriksirin,  
744 Colorimetric reverse transcription loop-mediated isothermal amplification (RT-LAMP) as a  
745 visual diagnostic platform for the detection of the emerging coronavirus SARS-CoV-2,  
746 *Analyst*. 146 (2021) 471–477. doi:10.1039/d0an01775b.
- 747 [34] M. Cohen, R. Khalaila, Saliva pH as a biomarker of exam stress and a predictor of exam

- 748 performance, *J. Psychosom. Res.* 77 (2014) 420–425. doi:10.1016/j.jpsychores.2014.07.003.
- 749 [35] S. Baliga, S. Muglikar, R. Kale, Salivary pH: A diagnostic biomarker, *J. Indian Soc.*  
750 *Periodontol.* 17 (2013) 461–465. doi:10.4103/0972-124X.118317.
- 751 [36] E. Gonzalez-Gonzalez, I.M. Lara-Mayorga, A. Garcia-Rubio, C.E. Garciamendez-Mijares,  
752 G.E. Guerra-Alvarez, G. Garcia-Martinez, J.A. Aguayo-Hernandez, Y.-S. Zhang, S.O.  
753 Martinez-Chapa, G. Trujillo-de Santiago, M.M. Alvarez, Scaling diagnostics in times of  
754 COVID-19: Rapid prototyping of 3D-printed water circulators for Loop-mediated  
755 Isothermal Amplification (LAMP) and detection of SARS-CoV-2 virus, Cold Spring Harbor  
756 Laboratory Press, 2020. doi:10.1101/2020.04.09.20058651.
- 757 [37] G. Papadakis, A. Pantazis, N. Fikas, S. Chatziioannidou, K. Michaelidou, V. Pogka, M.  
758 Megariti, M. Vardaki, K. Giarentis, J. Heaney, E. Nastouli, T. Karamitros, A. Mentis, S.  
759 Agelaki, E. Gizeli, Real-time colorimetric LAMP methodology for quantitative nucleic acids  
760 detection at the point-of-care, *BioRxiv.* (2020) 2020.07.22.215251.  
761 doi:10.1101/2020.07.22.215251.
- 762 [38] M. Janíková, J. Hodosy, P. Boor, B. Klempa, P. Celec, Loop-mediated isothermal  
763 amplification for the detection of SARS-CoV-2 in saliva, *Microb. Biotechnol.* 14 (2021)  
764 307–316. doi:10.1111/1751-7915.13737.
- 765
